# Supplementary material
Source: PubMed Central journal article supplement (PMC7077435)
Supplement: TSAB_A_1690597_SM5261.pdf [file TSAB_A_1690597_SM5261.pdf]

Helix 11

Helix 15

Helices E23\_1 & E23\_2

CCAP 211/20

```

      A   CU
    UCGC C GGC \
    |||| | ||| U
    AGCG G CCG /
      -   UG
  
```

```

      A   C
    C U C A
    | | | |
    G A G A
      A   G
  
```

```

      C--  U
    GGGCGGG U UGCGC C GGU  UGCC \
    ••||||| | ••||| | •||  |•|| U
    UUCGCCC A GUGCG G UCA  AUGG /
      CGU  U
  
```

*D. spaerckii*

UTEX 2074

```

      A   CU
    UCGC U GGC \
    |||| • ||| U
    AGCG G CCG /
      -   UG
  
```

```

      A   C
    C U U A
    | | • |
    G A G A
      A   G
  
```

```

      C--  U
    GGGCGGG C UGCGC U GGU  UGCC \
    ••||||| | ••||| • •||  |•|| U
    UUCGCCC G GUGCG G UCA  AUGG /
      CGU  U
  
```

*D. capsulata*
