# Supplementary material
Source: PubMed Central journal article supplement (PMC7077435)
Supplement: TSAB_A_1690597_SM5262.pdf [file TSAB_A_1690597_SM5262.pdf]

| strain              | original strain designation    | origin                                                      | revised name                      | accession #       | intron # |
|---------------------|--------------------------------|-------------------------------------------------------------|-----------------------------------|-------------------|----------|
| <b>CCAP 211/20</b>  | <i>Chlorella stigmatophora</i> | Isle of Man, off Port Erin, marine                          | <i>Droopiella spaerckii</i>       | <b>MN248523</b>   | 4        |
| <b>CCAP 211/21A</b> | <i>Chlorella ovalis</i>        | England, Essex, Althorne, River Crouch, brackish            | <i>Chlorella vulgaris</i>         | <b>MN248529</b>   | -        |
| <b>CCAP 211/21B</b> | <i>Chlorella ovalis</i>        | England, Essex, Hullbridge, River Crouch, brackish          | <i>Chlorella vulgaris</i>         | <b>MN248530</b>   | -        |
| <b>CCAP 211/27</b>  | <i>Chlorella marina</i>        | Isle of Man, Port Erin, marine, in cultures of a flagellate | <i>Chloroidium saccharophilum</i> | <b>MH551491</b>   | 1        |
| <b>CCAP 211/29A</b> | <i>Chlorella spaerckii</i>     | Wales, Conway, Moelfre, marine, shellfish tanks             | <i>Droopiella spaerckii</i>       | <b>MN248524</b>   | 4        |
| <b>CCAP 211/29B</b> | <i>Chlorella spaerckii</i>     | Wales, Angeleseey, Moelfre, marine plankton                 | <i>Droopiella spaerckii</i>       | <b>MN248525</b>   | 5        |
| <b>CCAP 211/75</b>  | <i>Chlorella</i> sp.           | Scotland, Loch Linnhe, marine, bottom sample                | <i>Chlorella vulgaris</i>         | <b>MN248531</b>   | -        |
| <b>CCAP 211/76</b>  | <i>Chlorella</i> sp.           | Scotland, south of the Hebrides, marine plankton            | <i>Chloroidium ellipsoideum</i>   | <b>MH551500</b>   | 1        |
| <b>SAG 30.96</b>    | <i>Amphikrikos</i> sp.         | Germany, List/Sylt, marine plankton from waddensea          | <i>Droopiella spaerckii</i>       | <b>MN248526</b>   | 5        |
| <b>SAG 2074</b>     | <i>Amphikrikos</i> sp.         | Hungary, Lake Balaton                                       | <i>Droopiella limnetica</i>       | <b>MN248528</b>   | 5        |
| <b>UTEX 2074</b>    | <i>Chlorella capsulata</i>     | USA, Florida, Sarasota Co., marine                          | <i>Droopiella capsulata</i>       | <b>MN248527 *</b> | 4 *      |
