# Supplementary material
Source: PubMed Central journal article supplement (PMC7077435)
Supplement: TSAB_A_1690597_SM5263.pdf [file TSAB_A_1690597_SM5263.pdf]

| <b>primer</b>     | <b>sequences (5'-3')</b>     | <b>reference</b>                          |
|-------------------|------------------------------|-------------------------------------------|
| <b>PCR</b>        |                              |                                           |
| <b>EAF3</b>       | TCGACAATCTGGTTGATCCTGCCAG    | Marin et al. (2003)                       |
| <b>ITS055R</b>    | CTCCTTGGTCCGTGTTTCAAGACGGG   | Marin et al. (2003)                       |
| <b>G500F</b>      | GAATGAGTACAATCTAAACCCCTTAAC  | Darienko et al. (2019)                    |
| <b>G800R</b>      | CATTACTCCGGTCCTACAGACCAACAGG | Darienko et al. (2019)                    |
| <b>sequencing</b> |                              |                                           |
| <b>N82F</b>       | ATACTGTGAAACTGCGAATGGCTC     | Marin et al. (2003), modified, this study |
| <b>E528F</b>      | TGCCAGCAGCYGCGGTAATTCAGC     | Marin et al. (2003), modified, this study |
| <b>N920F</b>      | CAAGGCTGAAACTTAAAKGAATTG     | Marin et al. (2003), modified, this study |
| <b>BR</b>         | TTGATCCTTCTGCAGGTTACCTAC     | Marin et al. (2003)                       |
| <b>N920R</b>      | TTCCGTCAATTCCTTTRAGTTTC      | Marin et al. (2003), modified, this study |
| <b>536R</b>       | GWATTACCGCGGCKGCTG           | Marin et al. (2003)                       |
| <b>GF</b>         | GGGATCCGTTTCCGTAGGTGAACCTGC  | Coleman et al. (1994)                     |
| <b>GR</b>         | GGGATCCATATGCTTAAGTTCAGCGGGT | Coleman et al. (1994)                     |
| <b>ITS2F</b>      | GCATCGATGAAGAACGCAGC         | Coleman et al. (1994)                     |
| <b>ITS3R</b>      | GCTGCGTTCTTCAGCGAT           | Coleman et al. (1994)                     |
| <b>E300F</b>      | GGGTTYGATTCCGGAGAGGGAGCC     | Marin et al. (2003)                       |
| <b>N1200F</b>     | AGGCRATAACAGGTCTGTGATGCCC    | Marin et al. (2003)                       |
| <b>1400F</b>      | CTGCCCTTTGTACACACCCGCCGTC    | Marin et al. (2003)                       |
| <b>N1200R</b>     | AACATCTAAGGGCATCACAGACCTG    | Marin et al. (2003)                       |
| <b>N1400R</b>     | GGTAGGAGCGACGGGCGGTGTGTAC    | Marin et al. (2003)                       |
| <b>E690F</b>      | GAGGTGAAATTCTTAG             | Marin et al. (2003)                       |
| <b>ITS05R</b>     | TACTTGTTTCGCTATCGGTCTCT      | this study                                |
| <b>E300R</b>      | GGCTCCCTCTCCGGAATCRAACCC     | Marin et al. (2003)                       |
| <b>NM690R</b>     | TCCAAGAATTCACCTCTG           | Hoef-Emden et al. (2002)                  |
