# Supplementary material
Source: PubMed Central journal article supplement (PMC7077435)
Supplement: TSAB_A_1690597_SM5264.pdf [file TSAB_A_1690597_SM5264.pdf]

| Accession #        | Strain #     | Habitat       | Reference               |
|--------------------|--------------|---------------|-------------------------|
| <b>HAPLOTYPE A</b> |              |               |                         |
| FM205832           | SAG 211-11b  | freshwater    | Luo et al. (2010)       |
| FN298919           | CCAP 211/111 | endosymbiotic | Pröschold et al. (2011) |
| FN298920           | CCAP 211/112 | endosymbiotic | Pröschold et al. (2011) |
| FN298921           | CCAP 211/113 | endosymbiotic | Pröschold et al. (2011) |
| <b>HAPLOTYPE B</b> |              |               |                         |
| AY591511           | SAG 211-11f  | terrestrial   | Müller et al. (2005)    |
| AY591512           | SAG 211-1e   | freshwater    | Müller et al. (2005)    |
| AY591510           | SAG 30.80    | freshwater    | Müller et al. (2005)    |
| KU306724           | KNUA27       | terrestrial   | Hong et al. (2016)      |
| <b>HAPLOTYPE C</b> |              |               |                         |
| AY591493           | SAG 211-11t  | freshwater    | Müller et al. (2005)    |
| AY591494           | SAG 211-8m   | freshwater    | Müller et al. (2005)    |
| AY591499           | SAG 211-19   | freshwater    | Müller et al. (2005)    |
| AY591498           | SAG 211-11j  | freshwater    | Müller et al. (2005)    |
| FN298922           | CCAP 211/114 | endosymbiotic | Pröschold et al. (2011) |
| FM205854           | CCAP 211/81  | freshwater    | Luo et al. (2010)       |
| KJ676107           | UTEX 26      | unknown       | Rosenberg et al. (2014) |
| <b>HAPLOTYPE D</b> |              |               |                         |
| AY591509           | SAG 211-11s  | freshwater    | Müller et al. (2005)    |
| AY591504           | SAG 211-11q  | unknown       | Müller et al. (2005)    |
| AY591501           | SAG 211-8l   | freshwater    | Müller et al. (2005)    |
| AY591503           | SAG 211-12   | freshwater    | Müller et al. (2005)    |
| AY591495           | SAG 2.80     | freshwater    | Müller et al. (2005)    |
| MN248529           | CCAP 211/21A | marine        | this study              |
| MN248530           | CCAP 211/21B | marine        | this study              |
| FN298918           | CCAP 211/110 | endosymbiotic | Pröschold et al. (2011) |
| AY591496           | CCALA 268    | unknown       | Müller et al. (2005)    |
| KJ676102           | UTEX 395     | unknown       | Rosenberg et al. (2014) |
| KY229191           | UTEX 1803    | unknown       | unpublished             |
| <b>HAPLOTYPE E</b> |              |               |                         |
| AY591500           | SAG 9.88     | freshwater    | Müller et al. (2005)    |
| <b>HAPLOTYPE F</b> |              |               |                         |
| AY591505           | SAG 211-11p  | freshwater    | Müller et al. (2005)    |
| <b>HAPLOTYPE G</b> |              |               |                         |
| FN298917           | CCAP 211/109 | endosymbiotic | Pröschold et al. (2011) |
| <b>HAPLOTYPE H</b> |              |               |                         |
| MN248531           | CCAP 211/75  | marine        | this study              |
| <b>HAPLOTYPE I</b> |              |               |                         |
| FM205853           | CCAP 211/80  | freshwater    | Luo et al. (2010)       |
| <b>HAPLOTYPE J</b> |              |               |                         |
| FM205855           | CCAP 211/82  | freshwater    | Luo et al. (2010)       |
| <b>HAPLOTYPE K</b> |              |               |                         |
| JX185298           | isolate D2   | unknown       | unpublished             |
| <b>HAPLOTYPE L</b> |              |               |                         |
| KJ676103           | UTEX 396     | unknown       | Rosenberg et al. (2014) |
